# Supplementary material for: (Non-) periodic variation of excited-state properties for coinage metal dimers M2 (M = Cu, Ag, Au, Rg)
Source: Royal Society of Chemistry journal article supplement (doi:10.1039/d4cp03134b), 2024-01-01
Supplement: d4cp03134b1.pdf [file d4cp03134b1.pdf]

## Supporting Information

### (non-) Periodic Variation of Excited-State Properties for Coinage Metal Dimers $M_2$ ( $M = \text{Cu}, \text{Ag}, \text{Au}, \text{Rg}$ )

Yanzhao Lu,<sup>1)</sup> Zhifan Wang,<sup>2)</sup> Minggang Guo,<sup>3)</sup> and Fan Wang<sup>1, a)</sup>

<sup>1)</sup>Institute of Atomic and Molecular Physics, Key Laboratory of High Energy Density Physics and

Technology, Ministry of Education, Sichuan University, Chengdu, P. R. China, 610065

<sup>2)</sup>College of Chemistry and Life Science, Chengdu Normal University, Chengdu, P. R. China, 611130

<sup>3)</sup>College of Physics and Optoelectronics Technology, Baoji University of Arts and Sciences, Baoji, P.

R. China, 721016

a) Corresponding author: [wangf44@gmail.com](mailto:wangf44@gmail.com)

Table S1. Ionization potentials (eV) and electron affinity energies (eV) of the Cu<sub>2</sub> molecule.

| SR             |        | SOC                     |        |
|----------------|--------|-------------------------|--------|
| IP             |        | IP                      |        |
| $^2\Sigma_g^+$ | 7.735  | $(1/2)_g(^2\Sigma_g^+)$ | 7.735  |
| $^2\Sigma_u^+$ | 8.985  | $(1/2)_u(^2\Sigma_u^+)$ | 8.976  |
| $^2\Pi_g$      | 9.125  | $(3/2)_g(^2\Pi_g)$      | 9.062  |
|                |        | $(1/2)_g(^2\Pi_g)$      | 9.168  |
| EA             |        | EA                      |        |
| $^2\Sigma_u^+$ | -0.557 | $(1/2)_u(^2\Sigma_u^+)$ | -0.557 |
| $^2\Pi_u$      | 0.441  | $(1/2)_u(^2\Pi_u)$      | 0.438  |
| $^2\Sigma_g^+$ | 0.503  | $(3/2)_u(^2\Pi_u)$      | 0.444  |
|                |        | $(1/2)_g(^2\Sigma_g^+)$ | 0.503  |

Table S2. Ionization potentials (eV) and electron affinity energies (eV) of the Ag<sub>2</sub> molecule.

| SR             |        | SOC                     |        |
|----------------|--------|-------------------------|--------|
| IP             |        | IP                      |        |
| $^2\Sigma_g^+$ | 7.616  | $(1/2)_g(^2\Sigma_g^+)$ | 7.607  |
| $^2\Sigma_u^+$ | 11.052 | $(1/2)_u(^2\Sigma_u^+)$ | 11.027 |
| $^2\Pi_g$      | 11.322 | $(3/2)_g(^2\Pi_g)$      | 11.183 |
|                |        | $(1/2)_g(^2\Pi_g)$      | 11.404 |
| EA             |        | EA                      |        |
| $^2\Sigma_u^+$ | -0.876 | $(1/2)_u(^2\Sigma_u^+)$ | -0.872 |
| $^2\Pi_u$      | 0.331  | $(1/2)_u(^2\Pi_u)$      | 0.321  |
| $^2\Sigma_g^+$ | 0.401  | $(3/2)_u(^2\Pi_u)$      | 0.340  |
|                |        | $(1/2)_g(^2\Sigma_g^+)$ | 0.401  |

Table S3. Ionization potentials (eV) and electron affinity energies (eV) of the Au<sub>2</sub> molecule.

| SR             |        | SOC                      |        |
|----------------|--------|--------------------------|--------|
| IP             |        | IP                       |        |
| $^2\Sigma_g^+$ | 9.301  | $(1/2)_g (^2\Sigma_g^+)$ | 9.287  |
| $^2\Sigma_u^+$ | 10.073 | $(3/2)_u (^2\Pi_u)$      | 9.786  |
| $^2\Pi_g$      | 10.262 | $(1/2)_g (^2\Sigma_g^+)$ | 9.927  |
|                |        | $(1/2)_g (^2\Pi_g)$      | 10.475 |
| EA             |        | EA                       |        |
| $^2\Sigma_u^+$ | -1.661 | $(1/2)_u (^2\Sigma_u^+)$ | -1.688 |
| $^2\Pi_u$      | 0.336  | $(1/2)_u (^2\Pi_u)$      | 0.286  |
| $^2\Sigma_g^+$ | 0.411  | $(3/2)_u (^2\Pi_u)$      | 0.369  |
|                |        | $(1/2)_g (^2\Sigma_g^+)$ | 0.404  |

Table S4. Ionization potentials (eV) and electron affinity energies (eV) of the Rg<sub>2</sub> molecule.

| SR             |        | SOC                      |        |
|----------------|--------|--------------------------|--------|
| IP             |        | IP                       |        |
| $^2\Pi_g$      | 9.973  | $(3/2)_g (^2\Pi_g)$      | 9.184  |
| $^2\Delta_u$   | 10.240 | $(5/2)_u (^2\Delta_u)$   | 9.389  |
| $^2\Delta_g$   | 10.770 | $(5/2)_g (^2\Delta_g)$   | 9.992  |
| $^2\Sigma_u^+$ | 10.813 | $(1/2)_g (^2\Pi_g)$      | 10.101 |
| $^2\Sigma_g^+$ | 11.653 | $(3/2)_u (^2\Delta_u)$   | 10.814 |
|                |        | $(1/2)_u (^2\Sigma_u^+)$ | 10.853 |
|                |        | $(1/2)_g (^2\Sigma_g^+)$ | 12.483 |
|                |        | $(3/2)_g (^2\Delta_g)$   | 12.487 |
| EA             |        | EA                       |        |
| $^2\Sigma_u^+$ | -2.761 | $(1/2)_u (^2\Sigma_u^+)$ | -2.827 |
| $^2\Pi_u$      | 0.574  | $(1/2)_u (^2\Pi_u)$      | 0.228  |
| $^2\Sigma_g^+$ | 1.478  | $(1/2)_g (^2\Sigma_g^+)$ | 0.664  |
|                |        | $(3/2)_u (^2\Pi_u)$      | 1.175  |

Table S5. Bond length ( $\text{\AA}$ ), harmony frequency ( $\text{cm}^{-1}$ ), adiabatic excitation energy (eV), and vertical excitation energies (eV) of  $\text{Cu}_2$  based on EOM-CCSD.

| State          |                                  | TZ    |       |       |            | QZ    |       |       |            | 5Z    |       |       |            |
|----------------|----------------------------------|-------|-------|-------|------------|-------|-------|-------|------------|-------|-------|-------|------------|
|                |                                  | $R_e$ | AEEs  | VEEs  | $\omega_e$ | $R_e$ | AEEs  | VEEs  | $\omega_e$ | $R_e$ | AEEs  | VEEs  | $\omega_e$ |
| SR             |                                  |       |       |       |            |       |       |       |            |       |       |       |            |
| $^1\Sigma_g^+$ | $(1\sigma_g^+)^2$                | 2.242 | 0     | 0     | 255        | 2.237 | 0     | 0     | 255        | 2.235 | 0     | 0     | 256        |
| $^3\Sigma_u^+$ | $(1\sigma_g^+)^1(2\sigma_u^+)^1$ | -     | -     | 2.044 | -          | -     | -     | 2.057 | -          | -     | -     | 2.063 | -          |
| $^3\Sigma_g^+$ | $(1\sigma_u^+)^1(2\sigma_u^+)^1$ | 2.229 | 2.257 | 2.255 | 251        | 2.223 | 2.333 | 2.331 | 251        | 2.222 | 2.367 | 2.366 | 252        |
| $^3\Pi_u$      | $\pi_g^1(2\sigma_u^+)^1$         | 2.234 | 2.351 | 2.349 | 248        | 2.229 | 2.428 | 2.427 | 248        | 2.227 | 2.464 | 2.463 | 250        |
| $^1\Sigma_g^+$ | $(1\sigma_u^+)^1(2\sigma_u^+)^1$ | 2.230 | 2.515 | 2.513 | 250        | 2.224 | 2.588 | 2.586 | 250        | 2.222 | 2.621 | 2.620 | 250        |
| $^1\Pi_u$      | $\pi_g^1(2\sigma_u^+)^1$         | 2.241 | 2.623 | 2.623 | 245        | 2.235 | 2.698 | 2.698 | 245        | 2.233 | 2.733 | 2.733 | 244        |
| $^1\Sigma_u^+$ | $(1\sigma_g^+)^1(2\sigma_u^+)^1$ | 2.380 | 2.704 | 2.794 | 215        | 2.376 | 2.741 | 2.826 | 214        | 2.373 | 2.759 | 2.841 | 215        |
| SOC            |                                  |       |       |       |            |       |       |       |            |       |       |       |            |
| $0_g^+(1)$     | $(^1\Sigma_g^+)$                 | 2.242 | 0     | 0     | 255        | 2.237 | 0     | 0     | 255        | 2.235 | 0     | 0     | 256        |
| $0_u^+(1)$     | $(^3\Sigma_u^+)$                 | -     | -     | 2.040 | -          | -     | -     | 2.054 | -          | -     | -     | 2.060 | -          |
| $1_u(1)$       | $(^3\Sigma_u^+)$                 | -     | -     | 2.041 | -          | -     | -     | 2.054 | -          | -     | -     | 2.061 | -          |
| $0_g^-$        | $(^3\Sigma_g^+)$                 | 2.233 | 2.246 | 2.244 | 249        | 2.226 | 2.321 | 2.320 | 249        | 2.225 | 2.356 | 2.355 | 251        |
| $1_g$          | $(^3\Sigma_g^+)$                 | 2.232 | 2.247 | 2.245 | 250        | 2.226 | 2.322 | 2.321 | 250        | 2.224 | 2.357 | 2.356 | 250        |
| $2_u$          | $(^3\Pi_u)$                      | 2.236 | 2.290 | 2.288 | 248        | 2.230 | 2.367 | 2.366 | 248        | 2.228 | 2.403 | 2.402 | 249        |
| $1_u(2)$       | $(^3\Pi_u)$                      | 2.238 | 2.332 | 2.331 | 247        | 2.232 | 2.409 | 2.408 | 247        | 2.230 | 2.445 | 2.444 | 248        |
| $0_u^+(1)$     | $(^3\Pi_u)$                      | 2.242 | 2.385 | 2.385 | 242        | 2.237 | 2.462 | 2.462 | 241        | 2.235 | 2.497 | 2.497 | 241        |
| $0_u^-(2)$     | $(^3\Pi_u)$                      | 2.240 | 2.396 | 2.395 | 246        | 2.234 | 2.472 | 2.472 | 246        | 2.232 | 2.508 | 2.507 | 247        |
| $0_g^+(2)$     | $(^1\Sigma_g^+)$                 | 2.235 | 2.501 | 2.499 | 245        | 2.229 | 2.573 | 2.572 | 245        | 2.227 | 2.607 | 2.606 | 247        |
| $1_u(3)$       | $(^1\Pi_u)$                      | 2.247 | 2.619 | 2.620 | 240        | 2.241 | 2.694 | 2.695 | 240        | 2.239 | 2.729 | 2.729 | 241        |
| $0_u^+(2)$     | $(^1\Sigma_u^+)$                 | 2.368 | 2.724 | 2.805 | 223        | 2.361 | 2.763 | 2.838 | 227        | 2.357 | 2.781 | 2.853 | 227        |

Table S6. Bond length (Å), harmony frequency (cm<sup>-1</sup>), adiabatic excitation energy (eV), and vertical excitation energies (eV) of Ag<sub>2</sub> based on EOM-CCSD.

| State                                        |                                                                                           | TZ             |       |       |                | QZ             |       |       |                | 5Z             |       |       |                |
|----------------------------------------------|-------------------------------------------------------------------------------------------|----------------|-------|-------|----------------|----------------|-------|-------|----------------|----------------|-------|-------|----------------|
|                                              |                                                                                           | R <sub>e</sub> | AEEs  | VEEs  | ω <sub>e</sub> | R <sub>e</sub> | AEEs  | VEEs  | ω <sub>e</sub> | R <sub>e</sub> | AEEs  | VEEs  | ω <sub>e</sub> |
| SR                                           |                                                                                           |                |       |       |                |                |       |       |                |                |       |       |                |
| <sup>1</sup> Σ <sub>g</sub> <sup>+</sup> (1) | (1σ <sub>g</sub> <sup>+</sup> ) <sup>2</sup>                                              | 2.546          | 0     | 0     | 189            | 2.537          | 0     | 0     | 191            | 2.538          | 0     | 0     | 191            |
| <sup>3</sup> Σ <sub>u</sub> <sup>+</sup>     | (1σ <sub>g</sub> <sup>+</sup> ) <sup>1</sup> (2σ <sub>u</sub> <sup>+</sup> ) <sup>1</sup> | -              | -     | 1.825 | -              | -              | -     | 1.835 | -              | -              | -     | 1.838 | -              |
| <sup>1</sup> Σ <sub>u</sub> <sup>+</sup>     | (1σ <sub>g</sub> <sup>+</sup> ) <sup>1</sup> (2σ <sub>u</sub> <sup>+</sup> ) <sup>1</sup> | 2.682          | 2.907 | 2.975 | 148            | 2.675          | 2.930 | 2.993 | 149            | 2.677          | 2.936 | 3.000 | 148            |
| <sup>3</sup> Π <sub>u</sub> (1)              | (1σ <sub>g</sub> <sup>+</sup> ) <sup>1</sup> π <sub>u</sub> <sup>1</sup>                  | 2.594          | 3.438 | 3.452 | 168            | 2.585          | 3.454 | 3.465 | 170            | 2.586          | 3.457 | 3.470 | 170            |
| <sup>3</sup> Σ <sub>g</sub> <sup>+</sup> (1) | (1σ <sub>g</sub> <sup>+</sup> ) <sup>1</sup> (2σ <sub>g</sub> <sup>+</sup> ) <sup>1</sup> | 2.784          | 4.238 | 4.333 | 113            | 2.779          | 4.266 | 4.377 | 114            | 2.781          | 4.269 | 4.391 | 111            |
| <sup>1</sup> Π <sub>u</sub> (1)              | (1σ <sub>g</sub> <sup>+</sup> ) <sup>1</sup> π <sub>u</sub> <sup>1</sup>                  | 2.646          | 4.463 | 4.500 | 147            | 2.638          | 4.483 | 4.517 | 149            | 2.641          | 4.487 | 4.522 | 148            |
| <sup>3</sup> Σ <sub>g</sub> <sup>+</sup> (2) | (1σ <sub>u</sub> <sup>+</sup> ) <sup>1</sup> (2σ <sub>u</sub> <sup>+</sup> ) <sup>1</sup> | 2.556          | 4.479 | 4.484 | 260            | 2.527          | 4.558 | 4.557 | 251            | 2.518          | 4.593 | 4.594 | 258            |
| <sup>1</sup> Σ <sub>g</sub> <sup>+</sup> (2) | (1σ <sub>u</sub> <sup>+</sup> ) <sup>1</sup> (2σ <sub>u</sub> <sup>+</sup> ) <sup>1</sup> | 2.555          | 4.591 | 4.591 | 131            | 2.589          | 4.654 | 4.660 | 111            | 2.625          | 4.675 | 4.687 | 107            |
| <sup>3</sup> Π <sub>u</sub> (2)              | π <sub>g</sub> <sup>1</sup> (2σ <sub>u</sub> <sup>+</sup> ) <sup>1</sup>                  | 2.505          | 4.652 | 4.653 | 189            | 2.496          | 4.752 | 4.754 | 191            | 2.497          | 4.798 | 4.800 | 191            |
| <sup>1</sup> Σ <sub>g</sub> <sup>+</sup> (3) | (1σ <sub>g</sub> <sup>+</sup> ) <sup>1</sup> (2σ <sub>g</sub> <sup>+</sup> ) <sup>1</sup> | 2.626          | 4.956 | 4.998 | 191            | 2.599          | 5.020 | 5.045 | 199            | 2.590          | 5.047 | 5.066 | 201            |
| <sup>1</sup> Π <sub>u</sub> (2)              | π <sub>g</sub> <sup>1</sup> (2σ <sub>u</sub> <sup>+</sup> ) <sup>1</sup>                  | 2.527          | 4.976 | 4.974 | 186            | 2.515          | 5.068 | 5.068 | 188            | 2.515          | 5.111 | 5.110 | 187            |
| SOC                                          |                                                                                           |                |       |       |                |                |       |       |                |                |       |       |                |
| 0 <sub>g</sub> <sup>+</sup> (1)              | ( <sup>1</sup> Σ <sub>g</sub> <sup>+</sup> )                                              | 2.547          | 0     | 0     | 189            | 2.538          | 0     | 0     | 191            | 2.539          | 0     | 0     | 191            |
| 0 <sub>u</sub> <sup>+</sup> (1)              | ( <sup>3</sup> Σ <sub>u</sub> <sup>+</sup> )                                              | -              | -     | 1.823 | -              | -              | -     | 1.832 | -              | -              | -     | 1.836 | -              |
| 1 <sub>u</sub> (1)                           | ( <sup>3</sup> Σ <sub>u</sub> <sup>+</sup> )                                              | -              | -     | 1.823 | -              | -              | -     | 1.832 | -              | -              | -     | 1.836 | -              |
| 0 <sub>u</sub> <sup>+</sup> (1)              | ( <sup>1</sup> Σ <sub>u</sub> <sup>+</sup> )                                              | 2.683          | 2.902 | 2.970 | 148            | 2.675          | 2.925 | 2.987 | 149            | 2.677          | 2.931 | 2.994 | 148            |
| 0 <sub>u</sub> <sup>-</sup> (2)              | ( <sup>3</sup> Π <sub>u</sub> )                                                           | 2.592          | 3.389 | 3.402 | 169            | 2.583          | 3.404 | 3.415 | 171            | 2.584          | 3.409 | 3.420 | 170            |
| 0 <sub>u</sub> <sup>+</sup> (2)              | ( <sup>3</sup> Π <sub>u</sub> )                                                           | 2.592          | 3.391 | 3.404 | 169            | 2.583          | 3.406 | 3.417 | 171            | 2.585          | 3.411 | 3.422 | 170            |
| 1 <sub>u</sub> (2)                           | ( <sup>3</sup> Π <sub>u</sub> )                                                           | 2.594          | 3.429 | 3.443 | 168            | 2.586          | 3.445 | 3.457 | 170            | 2.587          | 3.450 | 3.462 | 169            |
| 2 <sub>u</sub> (1)                           | ( <sup>3</sup> Π <sub>u</sub> )                                                           | 2.597          | 3.471 | 3.486 | 167            | 2.588          | 3.488 | 3.501 | 169            | 2.590          | 3.493 | 3.506 | 168            |
| 0 <sub>g</sub> <sup>-</sup> (1)              | ( <sup>3</sup> Σ <sub>g</sub> <sup>+</sup> )                                              | 2.785          | 4.227 | 4.319 | 112            | 2.780          | 4.255 | 4.365 | 114            | 2.782          | 4.259 | 4.379 | 111            |
| 1 <sub>g</sub> (1)                           | ( <sup>3</sup> Σ <sub>g</sub> <sup>+</sup> )                                              | 2.784          | 4.227 | 4.319 | 112            | 2.779          | 4.255 | 4.365 | 114            | 2.782          | 4.259 | 4.379 | 111            |
| 1 <sub>u</sub> (3)                           | ( <sup>1</sup> Π <sub>u</sub> )                                                           | 2.642          | 4.453 | 4.485 | 145            | 2.637          | 4.474 | 4.507 | 147            | 2.640          | 4.479 | 4.513 | 148            |
| 0 <sub>g</sub> <sup>-</sup> (2)              | ( <sup>3</sup> Σ <sub>g</sub> <sup>+</sup> )                                              | 2.565          | 4.458 | 4.467 | 252            | 2.536          | 4.537 | 4.537 | 242            | 2.525          | 4.572 | 4.573 | 250            |
| 1 <sub>g</sub> (2)                           | ( <sup>3</sup> Σ <sub>g</sub> <sup>+</sup> )                                              | 2.564          | 4.461 | 4.470 | 252            | 2.534          | 4.541 | 4.540 | 243            | 2.524          | 4.576 | 4.576 | 250            |
| 2 <sub>u</sub> (2)                           | ( <sup>3</sup> Π <sub>u</sub> )                                                           | 2.512          | 4.530 | 4.528 | 185            | 2.503          | 4.628 | 4.629 | 189            | 2.503          | 4.674 | 4.674 | 189            |
| 0 <sub>g</sub> <sup>+</sup> (2)              | ( <sup>1</sup> Σ <sub>g</sub> <sup>+</sup> )                                              | 2.560          | 4.567 | 4.567 | 137            | 2.586          | 4.632 | 4.638 | 119            | 2.616          | 4.655 | 4.667 | 111            |
| 1 <sub>u</sub> (4)                           | ( <sup>3</sup> Π <sub>u</sub> )                                                           | 2.528          | 4.608 | 4.607 | 195            | 2.512          | 4.702 | 4.702 | 189            | 2.511          | 4.746 | 4.746 | 188            |
| 0 <sub>u</sub> <sup>-</sup> (3)              | ( <sup>3</sup> Π <sub>u</sub> )                                                           | 2.520          | 4.737 | 4.735 | 180            | 2.510          | 4.835 | 4.835 | 183            | 2.511          | 4.881 | 4.881 | 182            |
| 0 <sub>u</sub> <sup>+</sup> (3)              | ( <sup>3</sup> Π <sub>u</sub> )                                                           | 2.514          | 4.749 | 4.747 | 184            | 2.505          | 4.848 | 4.848 | 187            | 2.506          | 4.893 | 4.893 | 186            |
| 0 <sub>g</sub> <sup>+</sup> (3)              | ( <sup>1</sup> Σ <sub>g</sub> <sup>+</sup> )                                              | 2.650          | 4.922 | 4.978 | 175            | 2.620          | 4.987 | 5.022 | 184            | 2.611          | 5.013 | 5.043 | 187            |
| 1 <sub>u</sub> (5)                           | ( <sup>1</sup> Π <sub>u</sub> )                                                           | 2.545          | 4.966 | 4.966 | 173            | 2.533          | 5.061 | 5.060 | 176            | 2.533          | 5.104 | 5.103 | 175            |

Table S7. Bond length (Å), harmony frequency (cm<sup>-1</sup>), adiabatic excitation energy (eV), and vertical excitation energies (eV) of Au<sub>2</sub> based on EOM-CCSD.

| State                                    |                                                                                           | TZ             |       |       |                | QZ             |       |       |                | 5Z             |       |       |                |
|------------------------------------------|-------------------------------------------------------------------------------------------|----------------|-------|-------|----------------|----------------|-------|-------|----------------|----------------|-------|-------|----------------|
|                                          |                                                                                           | R <sub>e</sub> | AEEs  | VEEs  | ω <sub>e</sub> | R <sub>e</sub> | AEEs  | VEEs  | ω <sub>e</sub> | R <sub>e</sub> | AEEs  | VEEs  | ω <sub>e</sub> |
| SR                                       |                                                                                           |                |       |       |                |                |       |       |                |                |       |       |                |
| <sup>1</sup> Σ <sub>g</sub> <sup>+</sup> | (1σ <sub>g</sub> <sup>+</sup> ) <sup>2</sup>                                              | 2.493          | 0     | 0     | 187            | 2.490          | 0     | 0     | 188            | 2.488          | 0     | 0     | 188            |
| <sup>3</sup> Σ <sub>u</sub> <sup>+</sup> | (1σ <sub>g</sub> <sup>+</sup> ) <sup>1</sup> (2σ <sub>u</sub> <sup>+</sup> ) <sup>1</sup> | -              | -     | 2.297 | -              | 2.888          | 1.955 | 2.307 | 62             | 2.889          | 1.961 | 2.310 | 61             |
| <sup>3</sup> Σ <sub>g</sub> <sup>+</sup> | (1σ <sub>u</sub> <sup>+</sup> ) <sup>1</sup> (2σ <sub>u</sub> <sup>+</sup> ) <sup>1</sup> | 2.478          | 2.344 | 2.341 | 185            | 2.474          | 2.421 | 2.418 | 186            | 2.471          | 2.454 | 2.452 | 186            |
| <sup>3</sup> Π <sub>u</sub>              | π <sub>g</sub> <sup>1</sup> (2σ <sub>u</sub> <sup>+</sup> ) <sup>1</sup>                  | 2.468          | 2.448 | 2.445 | 186            | 2.465          | 2.535 | 2.533 | 186            | 2.462          | 2.573 | 2.571 | 187            |
| <sup>1</sup> Σ <sub>g</sub> <sup>+</sup> | (1σ <sub>u</sub> <sup>+</sup> ) <sup>1</sup> (2σ <sub>u</sub> <sup>+</sup> ) <sup>1</sup> | 2.485          | 2.842 | 2.840 | 180            | 2.481          | 2.915 | 2.913 | 181            | 2.478          | 2.946 | 2.944 | 181            |
| <sup>1</sup> Σ <sub>u</sub> <sup>+</sup> | (1σ <sub>g</sub> <sup>+</sup> ) <sup>1</sup> (2σ <sub>u</sub> <sup>+</sup> ) <sup>1</sup> | 2.617          | 2.933 | 3.048 | 155            | 2.613          | 2.970 | 3.080 | 156            | 2.611          | 2.985 | 3.092 | 156            |
| <sup>1</sup> Π <sub>u</sub>              | π <sub>g</sub> <sup>1</sup> (2σ <sub>u</sub> <sup>+</sup> ) <sup>1</sup>                  | 2.484          | 2.928 | 2.926 | 179            | 2.480          | 3.009 | 3.007 | 180            | 2.478          | 3.045 | 3.043 | 180            |
| SOC                                      |                                                                                           |                |       |       |                |                |       |       |                |                |       |       |                |
| 0 <sub>g</sub> <sup>+</sup> (1)          |                                                                                           | 2.488          | 0     | 0     | 189            | 2.479          | 0     | 0     | 190            | 2.483          | 0     | 0     | 190            |
| 0 <sub>u</sub> <sup>+</sup> (1)          |                                                                                           | 2.786          | 1.941 | 2.157 | 75             | 2.783          | 1.972 | 2.186 | 75             | 2.793          | 1.965 | 2.194 | 73             |
| 1 <sub>u</sub> (1)                       |                                                                                           | 2.797          | 1.947 | 2.073 | 73             | 2.793          | 1.977 | 2.143 | 74             | 2.803          | 1.970 | 2.164 | 72             |
| 2 <sub>u</sub>                           |                                                                                           | 2.468          | 1.963 | 1.961 | 185            | 2.458          | 2.046 | 2.047 | 187            | 2.463          | 2.081 | 2.080 | 185            |
| 0 <sub>g</sub> <sup>-</sup>              |                                                                                           | 2.496          | 2.158 | 2.160 | 175            | 2.485          | 2.235 | 2.235 | 177            | 2.488          | 2.263 | 2.264 | 177            |
| 1 <sub>u</sub> (2)                       |                                                                                           | -              | -     | 2.245 | -              | 2.521          | 2.245 | 2.278 | 255            | 2.518          | 2.268 | 2.294 | 245            |
| 1 <sub>g</sub>                           |                                                                                           | 2.494          | 2.170 | 2.171 | 176            | 2.482          | 2.246 | 2.247 | 178            | 2.486          | 2.275 | 2.275 | 178            |
| 0 <sub>u</sub> <sup>+</sup> (1)          |                                                                                           | 2.531          | 2.439 | 2.455 | 157            | 2.523          | 2.515 | 2.529 | 157            | 2.529          | 2.541 | 2.556 | 154            |
| 0 <sub>g</sub> <sup>+</sup> (2)          |                                                                                           | 2.514          | 2.608 | 2.616 | 163            | 2.501          | 2.683 | 2.688 | 166            | 2.504          | 2.709 | 2.714 | 167            |
| 0 <sub>u</sub> <sup>-</sup> (2)          |                                                                                           | 2.544          | 2.669 | 2.699 | 164            | 2.527          | 2.746 | 2.764 | 168            | 2.530          | 2.771 | 2.791 | 168            |
| 1 <sub>u</sub> (3)                       |                                                                                           | 2.547          | 2.910 | 2.936 | 151            | 2.531          | 2.989 | 3.007 | 154            | 2.536          | 3.016 | 3.036 | 155            |
| 0 <sub>u</sub> <sup>+</sup> (2)          |                                                                                           | 2.547          | 3.175 | 3.211 | 178            | 2.535          | 3.224 | 3.251 | 180            | 2.539          | 3.234 | 3.265 | 186            |

Table S8. Bond length ( $\text{\AA}$ ), harmony frequency ( $\text{cm}^{-1}$ ), adiabatic excitation energy (eV), and vertical excitation energies (eV) of  $\text{Rg}_2$  based on EOM-CCSD.

| State           |                                  | TZ    |        |        |            | QZ    |        |        |            |
|-----------------|----------------------------------|-------|--------|--------|------------|-------|--------|--------|------------|
|                 |                                  | $R_e$ | AEEs   | VEEs   | $\omega_e$ | $R_e$ | AEEs   | VEEs   | $\omega_e$ |
| SR              |                                  |       |        |        |            |       |        |        |            |
| $1^1\Sigma_g^+$ | $(\pi_g)^4$                      | 2.497 | 0      | 0      | 194        | 2.471 | 0      | 0      | 207        |
| $3^1\Pi_u$      | $\pi_g^1(2\sigma_u^+)^1$         | 2.554 | 0.196  | 0.202  | 170        | 2.520 | 0.231  | 0.210  | 184        |
| $1^1\Pi_u$      | $\pi_g^1(2\sigma_u^+)^1$         | 2.576 | 0.921  | 0.939  | 155        | 2.534 | 0.967  | 0.943  | 174        |
| $3^1\Delta_g$   | $\delta_u^1(2\sigma_u^+)^1$      | 2.668 | 0.916  | 1.047  | 134        | 2.618 | 1.022  | 1.070  | 153        |
| $1^1\Delta_g$   | $\delta_u^1(2\sigma_u^+)^1$      | 2.676 | 1.071  | 1.213  | 131        | 2.623 | 1.182  | 1.234  | 150        |
| $3^1\Delta_u$   | $\delta_g^1(2\sigma_u^+)^1$      | 2.778 | 1.288  | 1.628  | 110        | 2.708 | 1.441  | 1.644  | 132        |
| $1^1\Delta_u$   | $\delta_g^1(2\sigma_u^+)^1$      | 2.789 | 1.416  | 1.769  | 107        | 2.713 | 1.574  | 1.785  | 130        |
| $3^1\Sigma_g^+$ | $(1\sigma_u^+)^1(2\sigma_u^+)^1$ | 2.615 | 1.901  | 1.966  | 157        | 2.579 | 1.926  | 1.934  | 171        |
| $1^1\Sigma_g^+$ | $(1\sigma_u^+)^1(2\sigma_u^+)^1$ | 2.649 | 2.157  | 2.262  | 142        | 2.603 | 2.196  | 2.227  | 158        |
| SOC             |                                  |       |        |        |            |       |        |        |            |
| $0_g^+(1)$      |                                  | 2.550 | 0      | 0      | 152        | 2.515 | 0      | 0      | 171        |
| $2_u(1)$        |                                  | 2.545 | -0.593 | -0.594 | 156        | 2.512 | -0.575 | -0.574 | 172        |
| $1_u(1)$        |                                  | 2.557 | -0.390 | -0.388 | 146        | 2.519 | -0.369 | -0.369 | 165        |
| $3_g$           |                                  | 2.649 | -0.007 | 0.072  | 122        | 2.598 | 0.067  | 0.106  | 143        |
| $2_g(1)$        |                                  | 2.646 | 0.047  | 0.122  | 122        | 2.595 | 0.121  | 0.156  | 143        |
| $0_u(1)$        |                                  | -     | -      | 0.214  | -          | -     | -      | 0.236  | -          |
| $1_u(2)$        |                                  | 2.892 | 0.181  | 0.553  | 123        | 2.830 | 0.334  | 0.567  | 114        |
| $3_u$           |                                  | 2.816 | 0.411  | 0.716  | 84         | 2.722 | 0.545  | 0.744  | 111        |
| $2_u(2)$        |                                  | 2.813 | 0.453  | 0.745  | 82         | 2.716 | 0.587  | 0.773  | 111        |
| $0_u^+$         |                                  | 2.537 | 0.624  | 0.621  | 172        | 2.510 | 0.639  | 0.704  | 184        |
| $2_g(2)$        |                                  | -     | -      | 1.352  | -          | 2.879 | 1.031  | 1.361  | 66         |
| $1_g(1)$        |                                  | -     | -      | 1.349  | -          | 2.823 | 1.106  | 1.366  | 72         |
| $0_g^-$         |                                  | 2.591 | 1.760  | 1.790  | 154        | 2.556 | 1.763  | 1.774  | 168        |
| $1_g(2)$        |                                  | 2.594 | 1.822  | 1.855  | 154        | 2.560 | 1.832  | 1.842  | 168        |
| $0_g^+(2)$      |                                  | 2.641 | 2.048  | 2.123  | 132        | 2.593 | 2.072  | 2.107  | 148        |

Table S9. Excitation energies ( $\Delta E/eV$ ), type assignments, NTO transitions, squared norm of doubles amplitudes ( $R_2$ ), NTO participation ratio ( $PR_{NTO}$ ), and the number of promoted electrons ( $p$ ) of the first six lowed excited states of  $Cu_2$  computed at EOMEE-CCSD/Aug-cc-pwcvQZ-PP level of theory.

| State          | $\Delta E$ | Type                             | Transition                                          | $R_2$ | $PR_{NTO}$ | $p$   |
|----------------|------------|----------------------------------|-----------------------------------------------------|-------|------------|-------|
| $^1\Sigma_g^+$ | 0          | $(1\sigma_g^+)^2$                | -                                                   | -     | -          | -     |
| $^3\Sigma_u^+$ | 2.057      | $(1\sigma_g^+)^1(2\sigma_u^+)^1$ | $\psi_{\sigma_g, H} \rightarrow \psi_{\sigma_u, E}$ | 0.055 | 1.045      | 1.345 |
| $^3\Sigma_g^+$ | 2.331      | $(1\sigma_u^+)^1(2\sigma_u^+)^1$ | $\psi_{\sigma_u, H} \rightarrow \psi_{\sigma_u, E}$ | 0.131 | 1.139      | 1.362 |
| $^3\Pi_u$      | 2.427      | $\pi_g^1(2\sigma_u^+)^1$         | $\psi_{\pi_g, H} \rightarrow \psi_{\sigma_u, E}$    | 0.131 | 1.193      | 1.384 |
| $^1\Sigma_g^+$ | 2.586      | $(1\sigma_u^+)^1(2\sigma_u^+)^1$ | $\psi_{\sigma_u, H} \rightarrow \psi_{\sigma_u, E}$ | 0.139 | 1.137      | 1.541 |
| $^1\Pi_u$      | 2.698      | $\pi_g^1(2\sigma_u^+)^1$         | $\psi_{\pi_g, H} \rightarrow \psi_{\sigma_u, E}$    | 0.139 | 1.198      | 1.541 |
| $^1\Sigma_u^+$ | 2.826      | $(1\sigma_g^+)^1(2\sigma_u^+)^1$ | $\psi_{\sigma_g, H} \rightarrow \psi_{\sigma_u, E}$ | 0.128 | 1.139      | 1.418 |

Table S10. Excitation energies ( $\Delta E/eV$ ), type assignments, NTO transitions, squared norm of doubles amplitudes ( $R_2$ ), NTO participation ratio ( $PR_{NTO}$ ), and the number of promoted electrons ( $p$ ) of the first six lowed excited states of  $Ag_2$  computed at EOMEE-CCSD/Aug-cc-pwcvQZ-PP level of theory.

| State             | $\Delta E$ | Type                             | Transition                                                                                            | $R_2$ | $PR_{NTO}$ | $p$   |
|-------------------|------------|----------------------------------|-------------------------------------------------------------------------------------------------------|-------|------------|-------|
| $^1\Sigma_g^+(1)$ | 0          | $(1\sigma_g^+)^2$                | -                                                                                                     | -     | -          | -     |
| $^3\Sigma_u^+$    | 1.835      | $(1\sigma_g^+)^1(2\sigma_u^+)^1$ | $\psi_{\sigma_g, H} \rightarrow \psi_{\sigma_u, E}$                                                   | 0.053 | 1.028      | 1.296 |
| $^1\Sigma_u^+$    | 2.993      | $(1\sigma_g^+)^1(2\sigma_u^+)^1$ | $\psi_{\sigma_g, H} \rightarrow \psi_{\sigma_u, E}$                                                   | 0.124 | 1.028      | 1.309 |
| $^3\Pi_u(1)$      | 3.465      | $(1\sigma_g^+)^1\pi_u^1$         | $\psi_{\sigma_g, H} \rightarrow \psi_{\pi_u, E}$                                                      | 0.047 | 1.045      | 1.294 |
| $^3\Sigma_g^+(1)$ | 4.377      | $(1\sigma_g^+)^1(2\sigma_g^+)^1$ | $\psi_{\sigma_g, H} \rightarrow \psi_{\sigma_g, E}/\psi_{\sigma_u, H} \rightarrow \psi_{\sigma_u, E}$ | 0.065 | 1.496      | 1.253 |
| $^1\Pi_u(1)$      | 4.517      | $(1\sigma_g^+)^1\pi_u^1$         | $\psi_{\sigma_g, H} \rightarrow \psi_{\pi_u, E}$                                                      | 0.088 | 1.045      | 1.321 |
| $^3\Sigma_g^+(2)$ | 4.557      | $(1\sigma_u^+)^1(2\sigma_u^+)^1$ | $\psi_{\sigma_u, H} \rightarrow \psi_{\sigma_u, E}/\psi_{\sigma_g, H} \rightarrow \psi_{\sigma_g, E}$ | 0.108 | 1.786      | 1.246 |
| $^1\Sigma_g^+(2)$ | 4.660      | $(1\sigma_u^+)^1(2\sigma_u^+)^1$ | $\psi_{\sigma_u, H} \rightarrow \psi_{\sigma_u, E}/\psi_{\sigma_g, H} \rightarrow \psi_{\sigma_g, E}$ | 0.106 | 1.496      | 1.341 |
| $^3\Pi_u(2)$      | 4.754      | $\pi_g^1(2\sigma_u^+)^1$         | $\psi_{\pi_g, H} \rightarrow \psi_{\sigma_u, E}$                                                      | 0.122 | 1.134      | 1.282 |
| $^1\Sigma_g^+(3)$ | 5.045      | $(1\sigma_g^+)^1(2\sigma_g^+)^1$ | $\psi_{\sigma_g, H} \rightarrow \psi_{\sigma_g, E}/\psi_{\sigma_u, H} \rightarrow \psi_{\sigma_u, E}$ | 0.169 | 1.786      | 1.333 |
| $^1\Pi_u(2)$      | 5.068      | $\pi_g^1(2\sigma_u^+)^1$         | $\psi_{\pi_g, H} \rightarrow \psi_{\sigma_u, E}$                                                      | 0.132 | 1.134      | 1.388 |



Table S11. Excitation energies ( $\Delta E/eV$ ), type assignments, NTO transitions, squared norm of doubles amplitudes ( $R_2$ ), NTO participation ratio ( $PR_{NTO}$ ), and the number of promoted electrons ( $p$ ) of the first six lowest excited states of  $Au_2$  computed at EOMEE-CCSD/Aug-cc-pwVQZ-PP level of theory.

| State          | $\Delta E$ | Type                             | Transition                                          | $R_2$ | $PR_{NTO}$ | $p$   |
|----------------|------------|----------------------------------|-----------------------------------------------------|-------|------------|-------|
| $^1\Sigma_g^+$ | 0          | $(1\sigma_g^+)^2$                | -                                                   | -     | -          | -     |
| $^3\Sigma_u^+$ | 2.307      | $(1\sigma_g^+)^1(2\sigma_u^+)^1$ | $\psi_{\sigma_g, H} \rightarrow \psi_{\sigma_u, E}$ | 0.069 | 1.039      | 1.293 |
| $^3\Sigma_g^+$ | 2.418      | $(1\sigma_u^+)^1(2\sigma_u^+)^1$ | $\psi_{\sigma_u, H} \rightarrow \psi_{\sigma_u, E}$ | 0.106 | 1.063      | 1.278 |
| $^3\Pi_u$      | 2.533      | $\pi_g^1(2\sigma_u^+)^1$         | $\psi_{\pi_g, H} \rightarrow \psi_{\sigma_u, E}$    | 0.109 | 1.075      | 1.273 |
| $^1\Sigma_g^+$ | 2.913      | $(1\sigma_u^+)^1(2\sigma_u^+)^1$ | $\psi_{\sigma_u, H} \rightarrow \psi_{\sigma_u, E}$ | 0.122 | 1.063      | 1.366 |
| $^1\Pi_u$      | 3.007      | $\pi_g^1(2\sigma_u^+)^1$         | $\psi_{\pi_g, H} \rightarrow \psi_{\sigma_u, E}$    | 0.123 | 1.049      | 1.371 |
| $^1\Sigma_u^+$ | 3.080      | $(1\sigma_g^+)^1(2\sigma_u^+)^1$ | $\psi_{\sigma_g, H} \rightarrow \psi_{\sigma_u, E}$ | 0.121 | 1.111      | 1.291 |

Table S12. Excitation energies ( $\Delta E/eV$ ), type assignments, NTO transitions, squared norm of doubles amplitudes ( $R_2$ ), NTO participation ratio ( $PR_{NTO}$ ), and the number of promoted electrons ( $p$ ) of the first eight lowest excited states of  $Rg_2$  computed at EOMEE-CCSD/PVQZ-SC level of theory.

| State          | $\Delta E$ | Type                             | Transition                                          | $R_2$ | $PR_{NTO}$ | $p$   |
|----------------|------------|----------------------------------|-----------------------------------------------------|-------|------------|-------|
| $^1\Sigma_g^+$ | 0          | $(\pi_g)^4$                      | -                                                   | -     | -          | -     |
| $^3\Pi_u$      | 0.210      | $\pi_g^1(2\sigma_u^+)^1$         | $\psi_{\pi_g, H} \rightarrow \psi_{\sigma_u, E}$    | 0.102 | 1.035      | 1.286 |
| $^1\Pi_u$      | 0.943      | $\pi_g^1(2\sigma_u^+)^1$         | $\psi_{\pi_g, H} \rightarrow \psi_{\sigma_u, E}$    | 0.119 | 1.024      | 1.287 |
| $^3\Delta_g$   | 1.070      | $\delta_u^1(2\sigma_u^+)^1$      | $\psi_{\delta_u, H} \rightarrow \psi_{\sigma_u, E}$ | 0.111 | 1.029      | 1.300 |
| $^1\Delta_g$   | 1.234      | $\delta_u^1(2\sigma_u^+)^1$      | $\psi_{\delta_u, H} \rightarrow \psi_{\sigma_u, E}$ | 0.125 | 1.024      | 1.298 |
| $^3\Delta_u$   | 1.644      | $\delta_g^1(2\sigma_u^+)^1$      | $\psi_{\delta_g, H} \rightarrow \psi_{\sigma_u, E}$ | 0.115 | 1.039      | 1.299 |
| $^1\Delta_u$   | 1.785      | $\delta_g^1(2\sigma_u^+)^1$      | $\psi_{\delta_g, H} \rightarrow \psi_{\sigma_u, E}$ | 0.131 | 1.032      | 1.296 |
| $^3\Sigma_g^+$ | 1.934      | $(1\sigma_u^+)^1(2\sigma_u^+)^1$ | $\psi_{\sigma_u, H} \rightarrow \psi_{\sigma_u, E}$ | 0.090 | 1.033      | 1.288 |
| $^1\Sigma_g^+$ | 2.227      | $(1\sigma_u^+)^1(2\sigma_u^+)^1$ | $\psi_{\sigma_u, H} \rightarrow \psi_{\sigma_u, E}$ | 0.121 | 1.023      | 1.284 |
